# Supplementary material for: Preformulation Studies and Bioavailability Enhancement of Curcumin with a ‘Two in One’ PEG-β-Cyclodextrin Polymer
Source: MDPI journal article supplement (doi:10.3390/pharmaceutics13101710), 2021-10-16
Supplement: s1 [file s1]

# Supplementary Materials: Preformulation Studies and Bioavailability Enhancement of Curcumin with a ‘Two in One’ PEG- $\beta$ -Cyclodextrin Polymer

Ádám Haimhoffer, Eleftheria Dossi, Monika Béresová, Ildikó Bácskay, Judit Váradi, Ashfaq Afsar, Ágnes Ruzsnyák, Gábor Vasvári and Ferenc Fenyvesi

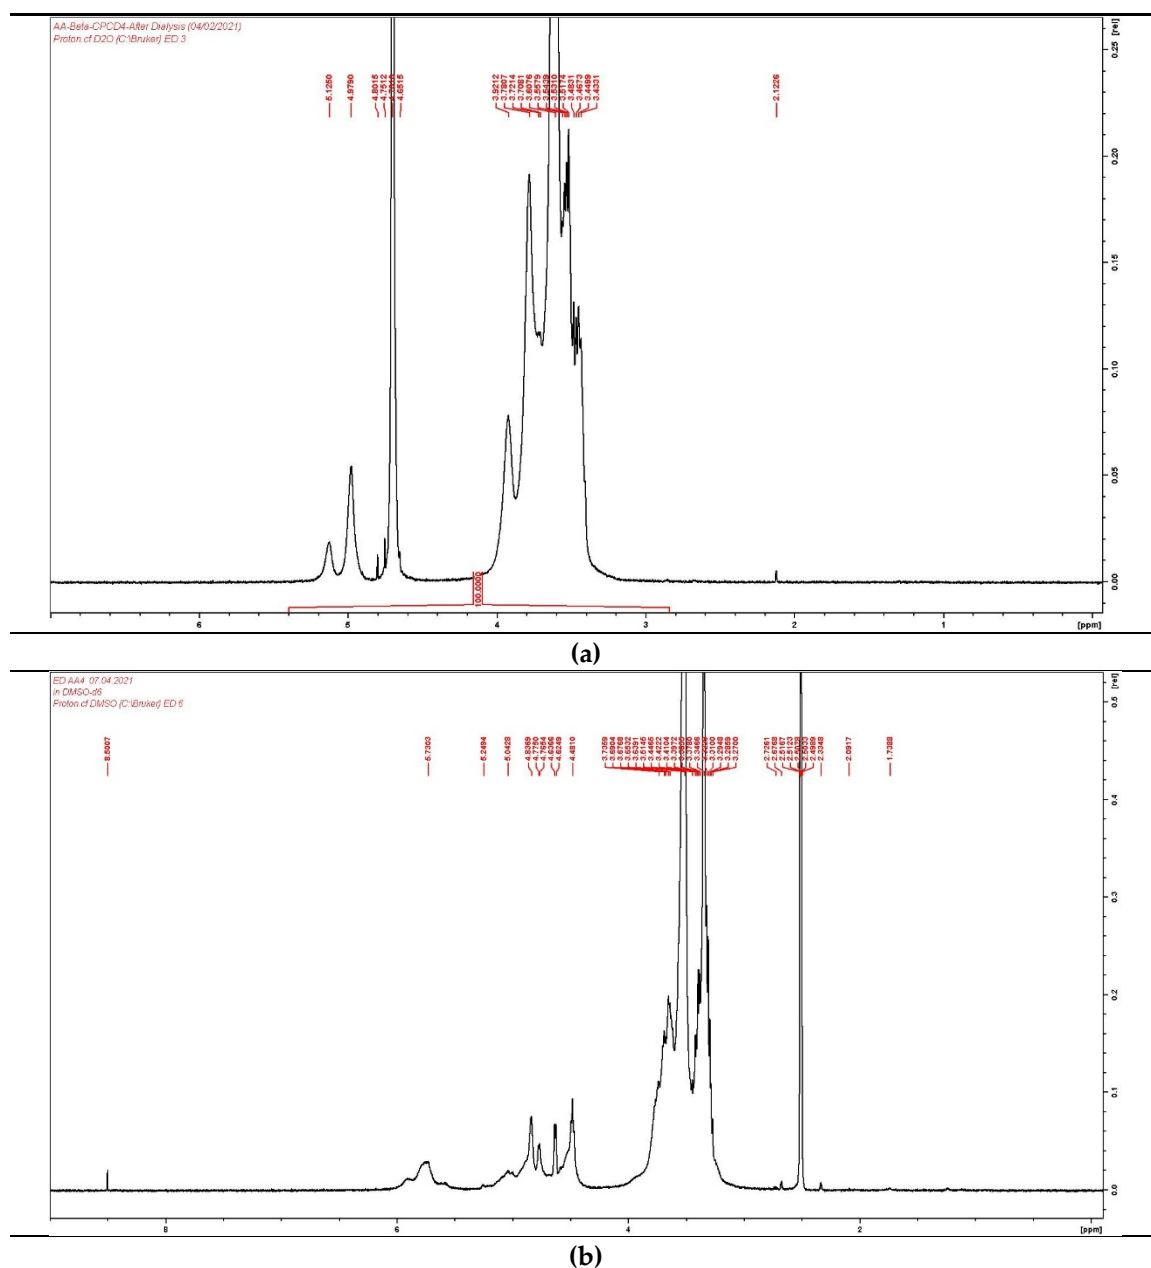

**Figure S1.**  $^1\text{H}$  NMR spectra of  $\beta$ CPD in  $\text{D}_2\text{O}$  (a) and in  $\text{DMSO-d}_6$  (b).

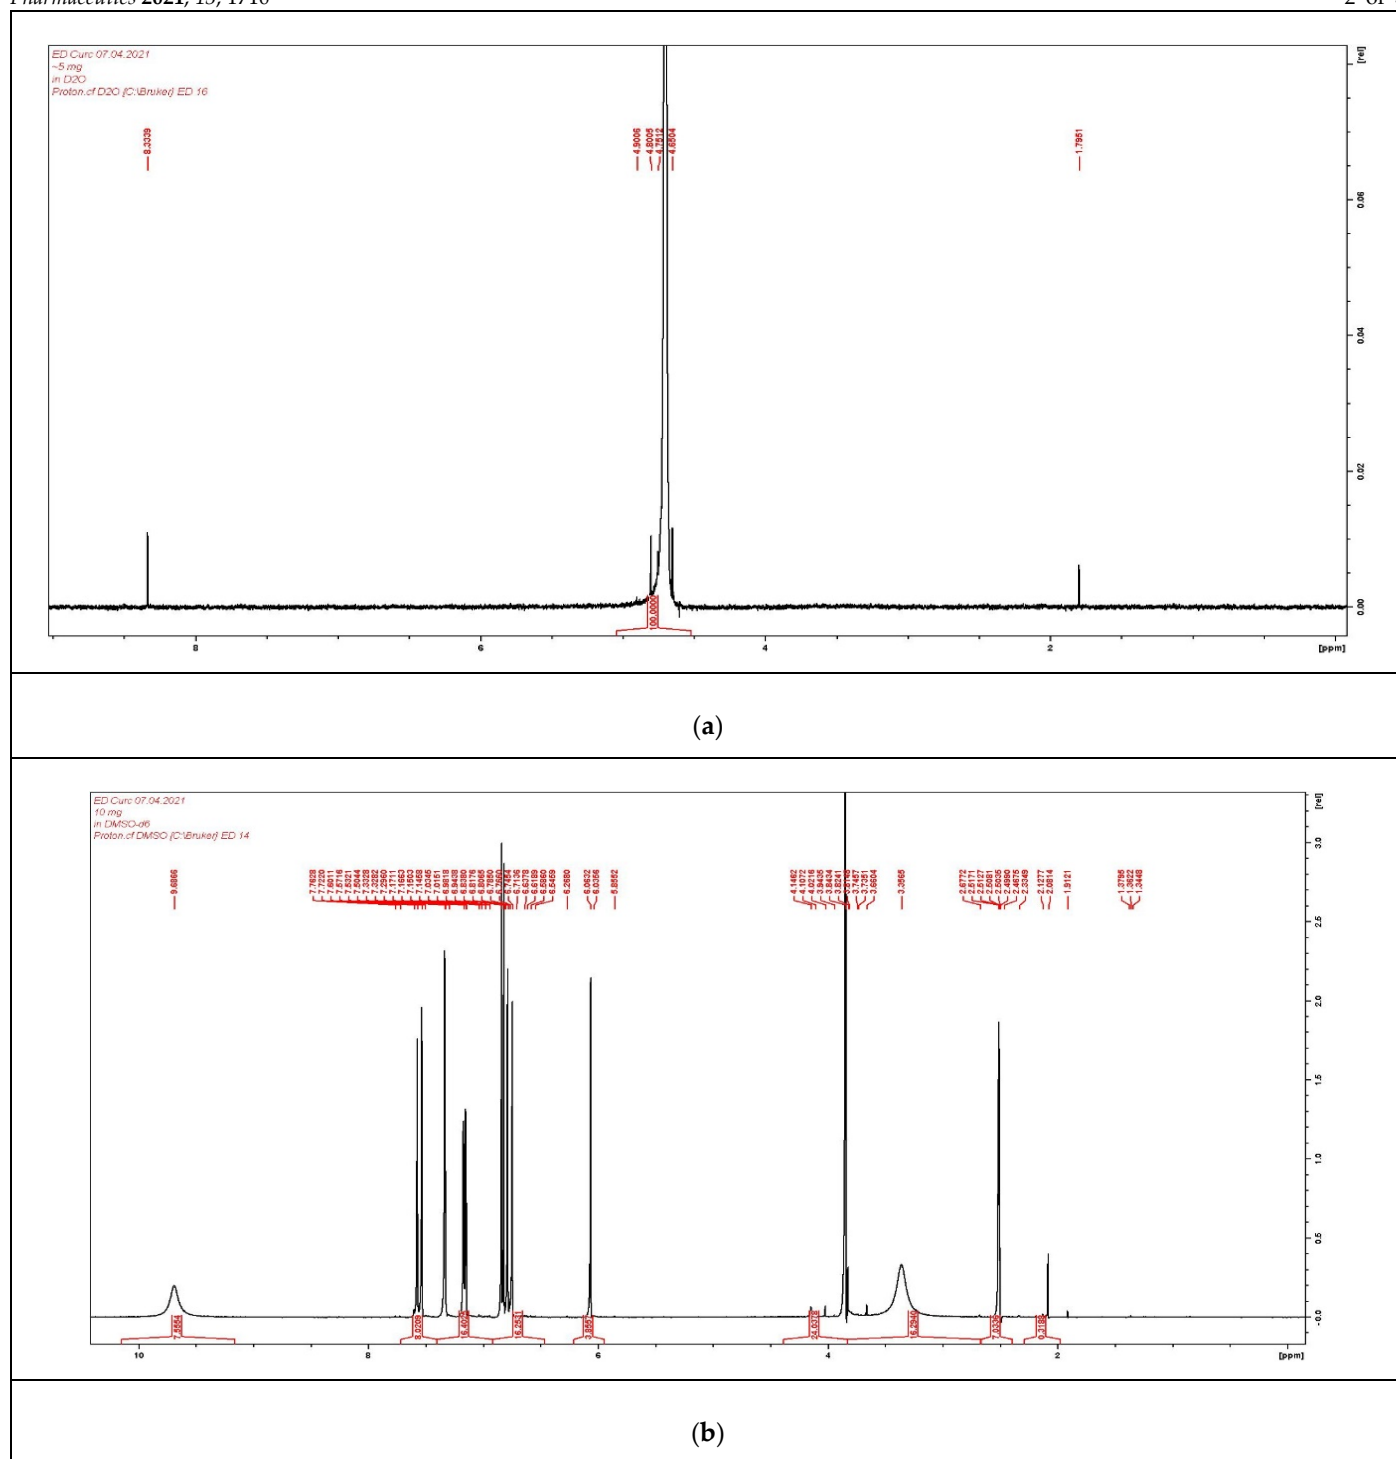

Figure S2.  $^1\text{H}$  NMR spectra of curcumin in  $\text{D}_2\text{O}$  (a) and in  $\text{DMSO-d}_6$  (b).

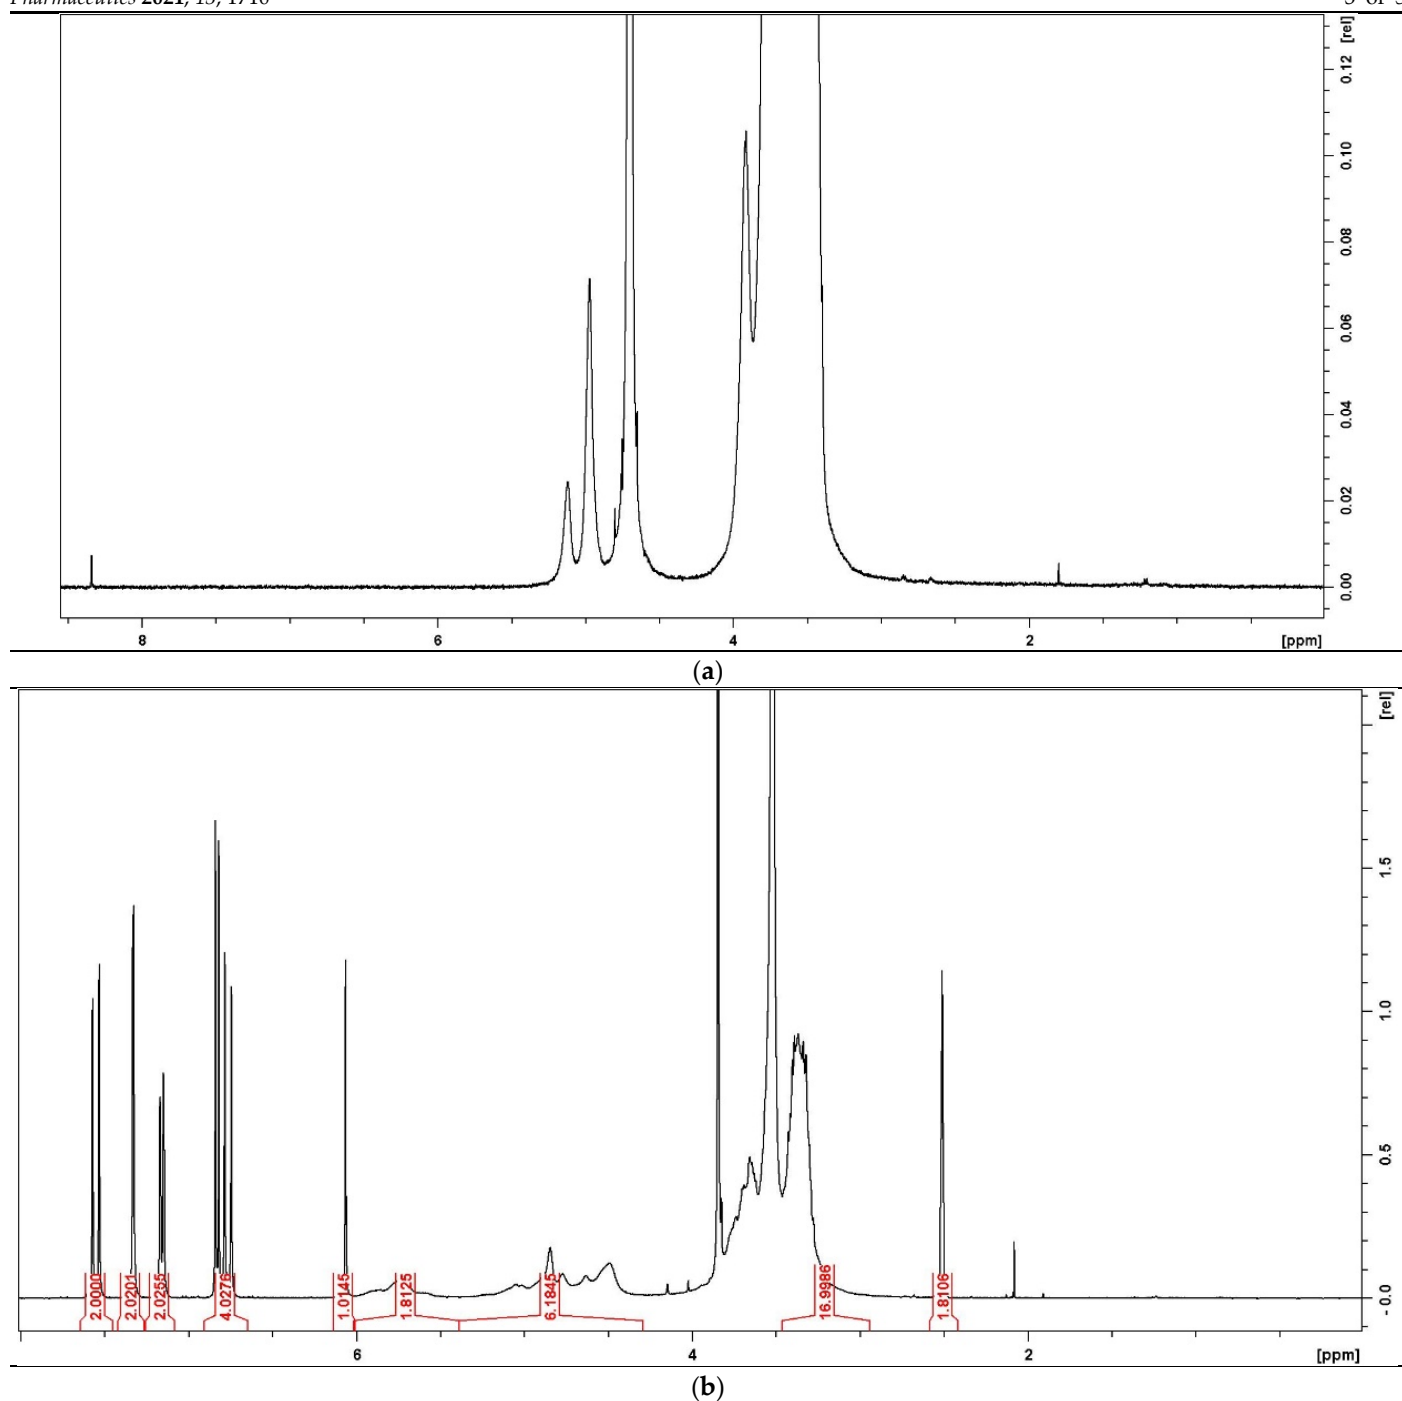

**Figure S3.**  $^1\text{H}$  NMR spectra of  $\beta\text{CPCD}$ -curcumin mixture in  $\text{D}_2\text{O}$  (a) and in  $\text{DMSO-d}_6$  (b).

The suspension in  $\text{D}_2\text{O}$  was then filtered using cotton wool and the solid was dried at high vacuum and re-dissolved in  $\text{DMSO-d}_6$  and the spectrum recorded (Figure S4).

As from the high solubility of the  $\beta\text{CPCD}$  in  $\text{D}_2\text{O}$ , the filtrate was expected to be only curcumin but surprisingly was a mixture of the two as from Figure S4. So, the solubility of both components is affected upon mixing. The curcumin (Quantity to be identified) is trapped in the polymeric network while the solubility of the polymer is decreased. We have observed the same behaviour here at Shrivenham, when  $\beta\text{CPCD}$  is mixed with inorganic salts such as  $\text{NaCl}$  and  $\text{NaCO}_3$ .

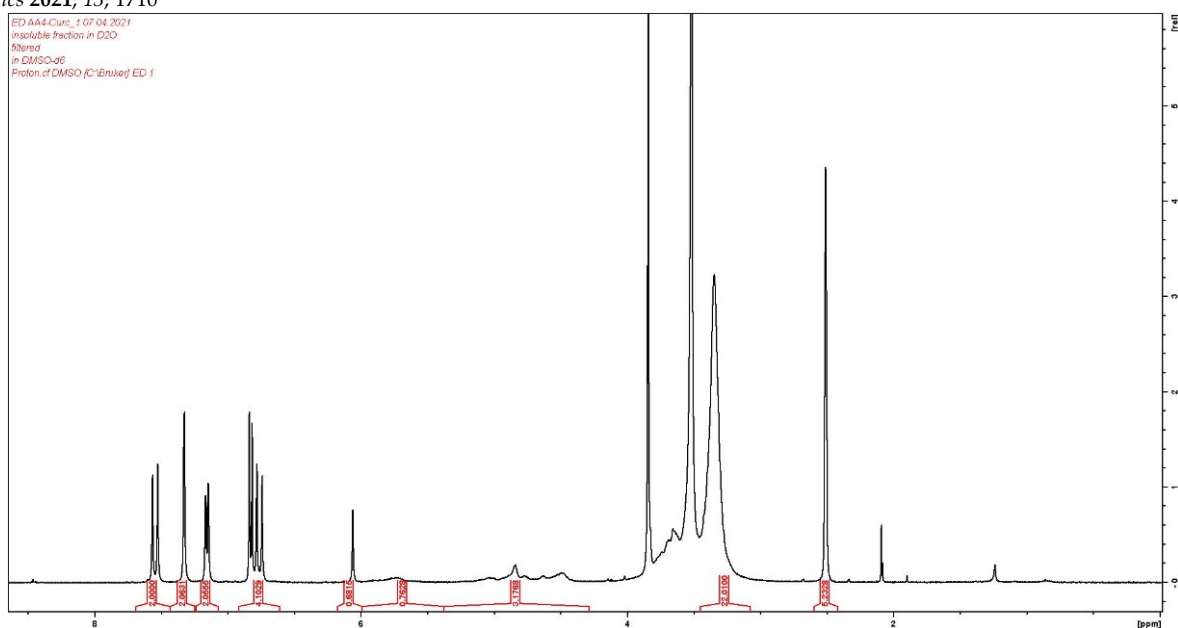

**Figure S4.** Full <sup>1</sup>H NMR spectra of insoluble in D<sub>2</sub>O βCPCD-curcumin mixture registered in DMSO-d<sub>6</sub>.

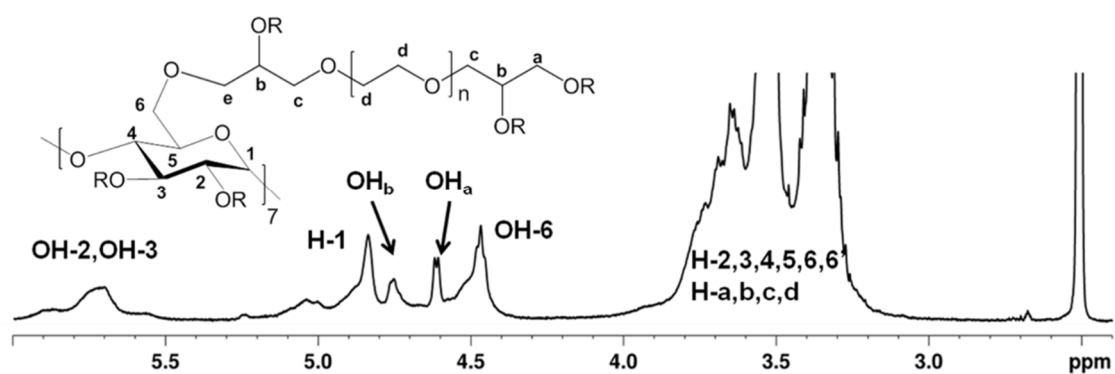

**Figure S5.**  $^1\text{H}$  NMR spectrum of  $\beta\text{CPCD}$  polymer in  $\text{DMSO-d}_6$  with proposed chemical structure and assignments of protons.

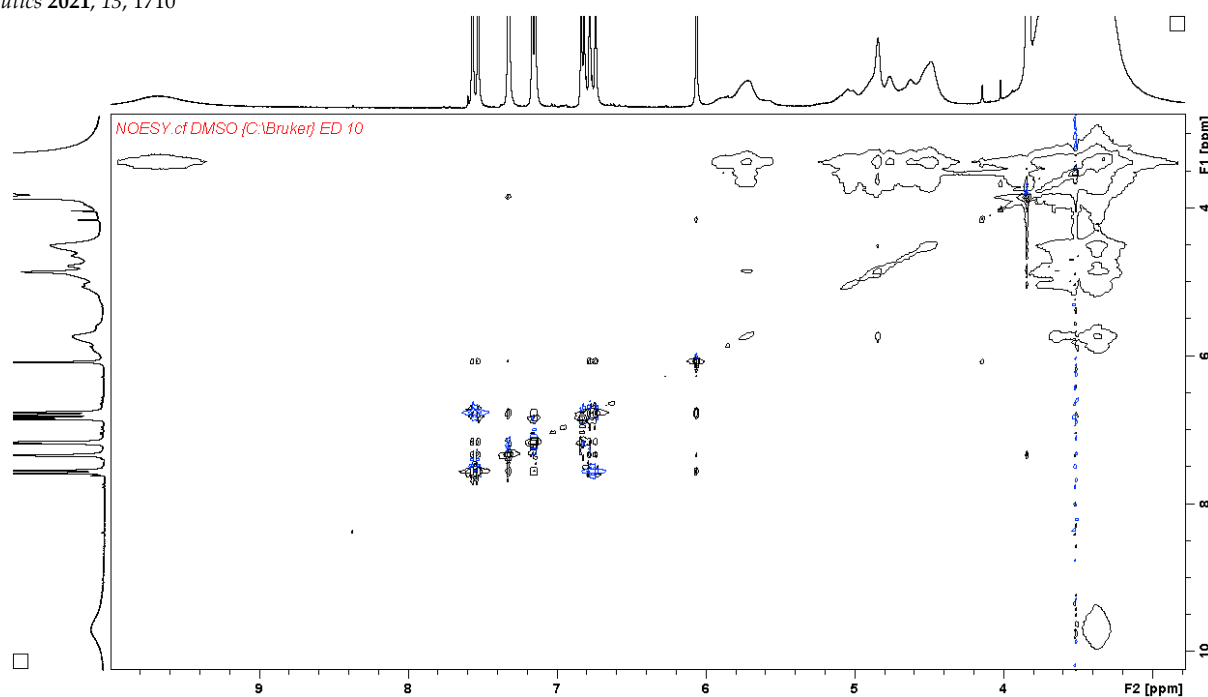

Figure S6. Full 2D NMR NOESY spectra in DMSO-d<sub>6</sub> of  $\beta$ CPCD-curcumin complex at 10.0–2.8 ppm.

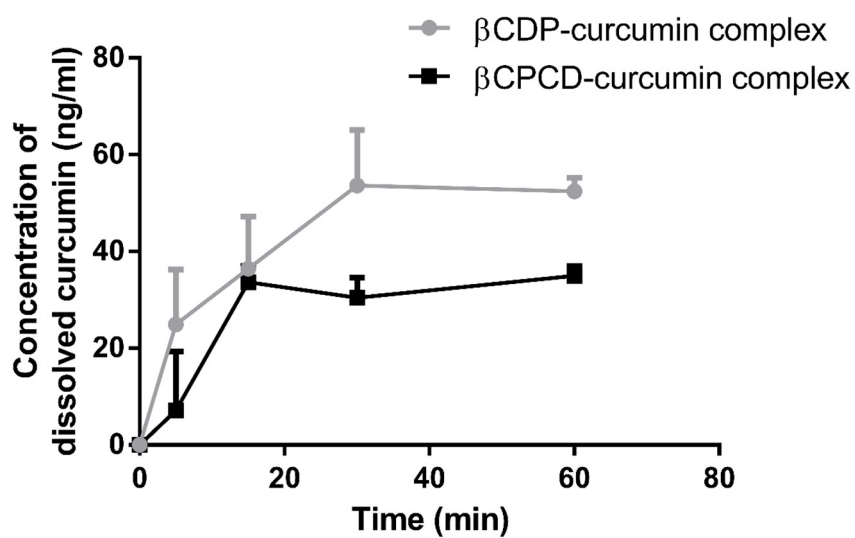

Figure S7. Concentration vs time dissolution curves of hard gelatin capsules filled with curcumin-cyclodextrin polymer complexes (data are presented as means  $\pm$  SD;  $n = 3$ ).
